# High-resolution model of Arabidopsis Photosystem II reveals the structural consequences of digitonin-extraction

André T. Graça<sup>a</sup>, Michael Hall<sup>a</sup>, Karina Persson<sup>a</sup> and Wolfgang P. Schröder<sup>a</sup>

<sup>a</sup>Department of Chemistry, Umeå University, SE-901 87 Umeå, Sweden

## Abstract

In higher plants, the photosynthetic process is performed and regulated by Photosystem II (PSII). *Arabidopsis thaliana* was the first higher plant with a fully sequenced genome, conferring it the status of a model organism; nonetheless, a high-resolution structure of its Photosystem II is missing. We present the first Cryo-EM high-resolution structure of Arabidopsis PSII supercomplex with average resolution of 2.79 Å, an important model for future PSII studies. The digitonin extracted PSII complexes demonstrate the importance of: the LHG2630-lipid-headgroup in the trimerization of the light-harvesting complex II; the stabilization of the PsbJ subunit and the CP43-loop E by DGD520-lipid; the choice of detergent to maintain the integrity of membrane protein complexes. We propose that PsbW and PsbH subunits participate in the phospho-signalling dimerization of the complex, important to the assembly/repair processes of Photosystem II. Furthermore, our data shows at the anticipated Mn<sub>4</sub>CaO<sub>5</sub>-site a single metal ion density as a reminiscent early stage of PSII photoactivation.

**Keywords:** Photosystem II (PSII), cryo-electron microscopy (cryo-EM), *Arabidopsis thaliana*, higher-plants, digitonin, Mn<sub>4</sub>CaO<sub>5</sub>, oxygen evolving-complex (OEC), phosphatidylglycerol (PG/LHG), digalactosyldiacylglycerol (DGDG/DGD).

## 23 Introduction

24 Plant photosynthesis is the most important natural process existing on our planet, in which  
25 solar radiation is converted into biomass (1, 2). It provides food, oxygen to breathe and  
26 renewable, sustainable energy. It is also one of the few processes that reduce amounts of  
27 greenhouse gas carbon dioxide in the air (3). The weed plant *Arabidopsis thaliana* (thale cress  
28 or mouse-ear cress) became a model organism for plant research due to several traits such as  
29 size, generation time, accessibility, manipulation, and genetics (4). The use of Arabidopsis as  
30 a model organism was enhanced as its full genome was sequenced and published in the year  
31 2000 (5).

32 Photosystem II (PSII)—a key player in photosynthesis—is a multi-subunit light-driven  
33 water:plastoquinone oxidoreductase (6) located in the thylakoid membrane of higher plants'  
34 chloroplasts (7). Functional PSII has a dimeric core, surrounded by light-harvesting complexes  
35 (LHCII), and thus constitutes one of the largest protein complexes in nature with more than  
36 60 protein subunits and a molecular mass exceeding 1400 kDa (8). In its monomeric  
37 composition, Photosystem II reaction centre is built of the essential D1-D2 heterodimer, that  
38 hosts several cofactors responsible for the light-induced charge separation and water  
39 oxidation (6, 8). These core proteins are connected to an internal core chlorophyll *a* binding  
40 antenna, composed of CP43 and CP47 proteins (9). Chlorophyll *a/b* binding minor antenna  
41 proteins (CP24, CP26, CP29) link the major chlorophyll *a/b* binding LHCII to the PSII core (10,  
42 11). The trimeric LHCII is the most abundant chlorophyll-binding protein assembly in  
43 eukaryotic photosynthetic organisms, and it is constituted of three polypeptides, lhcb1-3 (12,  
44 13). Several of these trimeric assemblies can bind simultaneously to a PSII core complex  
45 (PSIIcc) at specific locations. Their relative location to the PSII dimer and the strength of the  
46 PSII-LHCII interaction creates 3 distinct classes (14): strong (S), medium (M), and loose (L) or  
47 naked (N). The L- or N-LHCII type was recently discovered in the green alga *Chlamydomonas*  
48 *reinhardtii* (15–17); although they can be found in higher plants, such trimers are not  
49 abundantly associated with PSII under optimal light conditions.

50 The lumen side of higher plants PSII complex harbours four extrinsic proteins (PsbO, PsbP,  
51 PsbQ and PsbTn). Additionally, there are at least 10 low molecular mass proteins (< 10 kDa)  
52 at various sites, between major proteins and in the outskirts of the complex (18). An immense

53 network of pigments, lipids and other essential cofactors are known to bind to the different  
54 proteins of the complex (8, 19–21). The pigments—chlorophylls and carotenoids—are  
55 essential for light absorption while the lipids main function is the ligation of different subunits  
56 at several oligomerization interfaces and the binding of some pigments (22).

57 Structural studies of Photosystem II were for an extended period restricted to X-ray  
58 crystallography methods which demand high concentrations of pure homogeneous and stable  
59 complexes and the capability of symmetric assembly to form crystals (23, 24). Thus, structural  
60 studies of bacterial PSII from *Thermosynechococcus elongates* and *Thermosynechococcus vulcanus*  
61 have been commonly performed due to their high stability and accessible large batch  
62 extraction. Such attempts resulted in several high- to near atomic resolution structures,  
63 between 1.9-3.8 Å average resolution (20, 25–28). The bacterial PSII<sub>cc</sub> is expected to be very  
64 similar to the dimeric PSII core of higher plants (PSII C<sub>2</sub>), however there are several distinct  
65 differences (29): i. bacterial PSII lacks chlorophyll *b*; ii. the light-harvesting antenna is  
66 integrated into the membrane in higher plants, while it is peripheral in bacteria  
67 (phycobilisomes); iii. the extrinsic proteins differ between bacteria and higher plants; iv. the  
68 pigments and the lipids not always share conserved binding-sites between species of different  
69 kingdoms.

70 Higher plant PSII supercomplexes have traditionally been extracted from thylakoid  
71 membranes using dodecylmaltoside ( $\alpha$ - or  $\beta$ - isoforms) and digitonin detergents (30–32).  
72 Other detergents have been screened for the purpose, but results show that PSII complexes  
73 do not remain stable in a wide variety of detergents (30). The high concentration of detergents,  
74 and the different sizes of PSII complexes extracted from the thylakoid membrane, are two  
75 factors that hindered the formation of stable crystal assemblies (33, 34). A new opportunity to  
76 study the higher plants PSII structure came with the recent developments of single-particle  
77 cryo-electron microscopy (EM) (35). This method allows acquisition of structural information  
78 from large protein complexes at resolutions similar to X-ray crystallography. As the sample is  
79 plunge frozen and the imaged particles are segregated into classes upon computational  
80 analyses, the sample does not need to be as pure and enriched as for crystallisation and their  
81 level of stability is only relevant up to the moment of plunge freezing (35). The first higher  
82 plant PSII Cryo-EM structures were recently reported for; *Spinacia oleracea* (Spinach) at 3.2 Å

83 resolution (Wei et al. 2016; PDB: 3JCU) (21); *Pisum Sativum* (Pea), with a resolution of 2.7 Å  
84 and 3.2 Å (Su et al. 2017; PDB: 5XNL and 5XNM, respectively) (19), the former consisting of a  
85 minor C<sub>2</sub>S<sub>2</sub> complex. However, concerning *Arabidopsis thaliana*, the best structural model of  
86 PSII (Bezouwen et al. 2017; PDB: 5MDX) (32)—extracted from a mutant phenotype—has a  
87 resolution of 5.3 Å.

88 Photosystem II oxygen production concurrently exposes the complex to oxidative stress,  
89 leading to damage of the D1 protein (36). To cope with this, plants have developed various  
90 protective mechanisms, such as the ability to repair the PSII complex by replacing the D1  
91 protein (37). Under high-light conditions, i.e. when plants absorb more light than they can use  
92 for photosynthesis—photoinhibition—the D1 protein is replaced every 20-30 minutes, which  
93 means that the assembly state of PSII is in a constant switch between functional and  
94 repair/inactive state. To become functional, PSII needs to correctly assemble the site for water  
95 oxidation; a process driven by light and known as photoactivation (36, 38). At distinct steps  
96 of photoactivation, manganese ions (Mn<sup>2+</sup>) interact with specific residues of the D1 protein,  
97 while being oxidized (38). One calcium ion (Ca<sup>2+</sup>) and five oxygen atoms bridging the metal  
98 ions are indispensable to form the functional high-valence manganese cluster, Mn<sub>4</sub>CaO<sub>5</sub>.  
99 When the full water oxidation complex is formed, Mn<sub>4</sub>CaO<sub>5</sub> is coordinated to several D1 and  
100 CP43 amino acids (25). Even though most of the photoactivation steps are still to be  
101 understood, there is evidence that manganese and calcium ions compete to bind at the high-  
102 affinity Mn-binding site (HAS) (38)—involving at least the D1 residue Asp170—in an early  
103 step of photoactivation. The following steps are the oxidation of the first-bound Mn<sup>2+</sup> and the  
104 so-called ‘dark rearrangement’, proposed as a light-independent dynamic where the C-  
105 terminal of the D1 protein adopts a new structural conformation like the observed in the  
106 Mn<sub>4</sub>CaO<sub>5</sub> binding pocket of mature PSII (38). In an attempt to gain new information of this  
107 activation process, Gisriel and colleagues (39) isolated monomeric PSII from *Synechocystis* sp.  
108 PCC 6803 that were EDTA-washed and buffer exchanged. This recent study showed that the  
109 Mn<sub>4</sub>CaO<sub>5</sub>-binding pocket undergoes major rearrangements upon assembly of the OEC, before  
110 the formation of a fully functional PSII.

111 Here we present the first high-resolution structure of Arabidopsis PSII C<sub>2</sub>S<sub>2</sub>M<sub>2</sub> supercomplex.  
112 This model shows that the absence of the extrinsic PsbP and PsbQ proteins leads to a

113 disordered C-terminus of the reaction centre D1 protein which we speculate to be important  
114 for the assembly process of the manganese water splitting complex of PSII. Furthermore, new  
115 knowledge of protein-protein, protein-ligand and ligand-ligand interactions is attained by  
116 accessing the consequences of the digitonin molecules bound to PSII.

117

## 118 Results

### 119 The overall structure of the Arabidopsis Photosystem II complex

120 The imaged Photosystem II C<sub>2</sub>S<sub>2</sub>M<sub>2</sub>-type complexes were isolated from wild-type Arabidopsis  
121 BBY membrane fragments (40) solubilised with a mixture of digitonin and β-DDM detergents.  
122 Visual inspection of the obtained micrographs suggested a high level of sample homogeneity.  
123 At the same time, the implemented *ab initio* 3D reconstruction strategy allowed us to further  
124 filter the dataset to a more homogeneous subset of 100 712 PSII particles. The 3D  
125 reconstruction, with imposed C<sub>2</sub> symmetry, yielded a map at an overall resolution of 2.79 Å  
126 for the C<sub>2</sub>S<sub>2</sub> supercomplex, according to FSC<sub>0.143</sub> golden standard (*SI Appendix, Fig. S2 and*  
127 *Table S1*). However, the resolution was found to be heterogeneous, with a higher resolution  
128 of 2.5 Å throughout the core region and a lower resolution of 6.0 Å in the outer regions of the

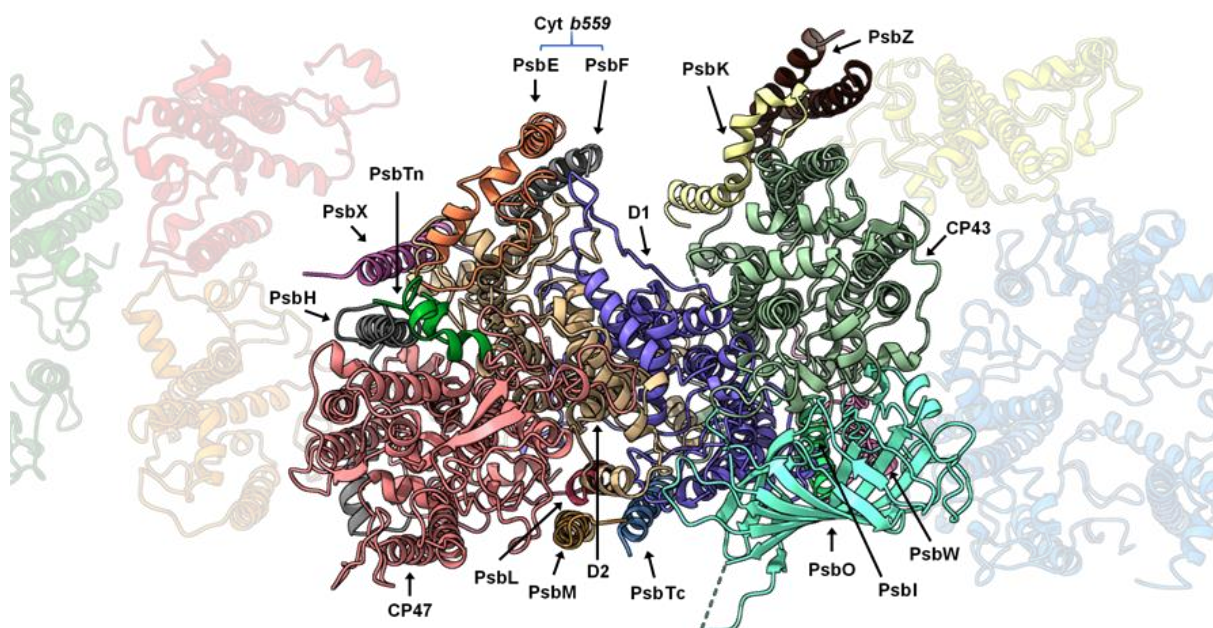

**Figure 1** – Localization of the Photosystem II core proteins. An entire PSII monomer is displayed in first plane, as seen from the lumen side of the thylakoid membrane, with the peripheral antennae in the background.

129 complex (*SI Appendix, Fig. S2*). An additional data collection using a Volta phase plate was  
130 performed on the same grid, yielding a map at 3.6 Å global resolution (C<sub>2</sub>S<sub>2</sub>M<sub>2</sub>) helping to  
131 resolve certain regions of the complex.

132 The Arabidopsis PSII C<sub>2</sub>S<sub>2</sub>M<sub>2</sub> supercomplex has a two-fold symmetry structure (*SI Appendix,*  
133 *Fig. S3*), with dimensions estimated to be 280 x 180 x 107 Å (LWH). Our model revealed the  
134 presence of 17 different protein subunits in the PSII core complex (*SI Appendix, Table S2*),  
135 including PsbA (D1), PsbB (CP47), PsbC (CP43), PsbD (D2), PsbE, PsbF, PsbH, PsbI, PsbK  
136 PsbL, PsbM, PsbO, PsbTc, PsbTn, PsbW, PsbX and PsbZ. An overview of the modelled  
137 proteins and their location in the Arabidopsis PSII monomer is shown in **Figure 1**. Comparing  
138 this model to the Pea and Spinach models, the spatial distribution of the core proteins did not  
139 reveal any dramatic change, which suggests that the PSII core is structurally and  
140 compositionally very well conserved among higher plants. The light-harvesting proteins  
141 CP24, CP26, CP29 and four LHCI trimers were identified and modelled (*SI Appendix, Table*  
142 *S3*). The highly resolved features of the map, especially of the core complex proteins, allowed  
143 that several new structural observations could be made including: 35 N-terminal amino acids  
144 of the D1 protein, lacking on the previous medium-resolution Arabidopsis PSII model (PDB:  
145 5MDX), were fully modelled; similarly, N- and C-termini of D2 were modelled to a greater  
146 extent when compared to 5MDX; the nuclear-encoded extrinsic protein PsbTn; one chloride  
147 (Cl<sup>-</sup>) ion was found bound to the complex (*SI Appendix, Fig. S4*) in the vicinity of the OEC; the  
148 vast carotenoid pigment network and the lipids present in PSII; and 141 water molecules were  
149 modelled.

150 The main four core proteins—D1, D2, CP47 and CP43—bind together 73 cofactors of which  
151 35 are chlorophylls *a* (*SI Appendix, Figure S5*). The current resolution enabled us to model the  
152 correct spatial orientation of chlorophylls' chlorin rings and often the full extension of their  
153 hydrophobic tails.

154 In total, 162 chlorophyll *a*, 60 chlorophyll *b*, four pheophytin *a*, and two heme molecules were  
155 modelled. Additionally, 60 lipids (**Figure 2A**), 42 carotenoids (*SI Appendix, Figure S6*), and two  
156 bicarbonate molecules were visible in our EM map and for the first time described in an  
157 Arabidopsis PSII model (*SI Appendix, Table S4*). Besides the cofactors mentioned above, 22  
158 digitonin molecules were identified and modelled (**Figure 2B**). The well-defined densities of

159 these detergent molecules and those of the several PSII cofactors present in our model,  
160 demonstrate the quality of the obtained EM map (*SI Appendix, Fig. S7*).

161 Of the four extrinsic proteins (PsbO, PsbP, PsbQ, and PsbTn), PsbO and PsbTn were detected  
162 in our EM map. The Arabidopsis genome encodes two isoforms of the PsbO protein, referred  
163 to as PsbO1 and PsbO2, that share 90% sequence identity. PsbO1 is expressed at a higher level  
164 than its counterpart and it is suggested to be bound to PSII and involved in its activity (41).  
165 With a high-resolution structure of PSII we can differentiate between some of the non-  
166 conserved residues between the two isoforms. The densities corresponding to PsbO residues  
167 at positions 128 and 187, fit better to a proline and an asparagine as in PsbO1, than the  
168 corresponding alanine and lysine residues of PsbO2. Therefore, we have modelled PsbO  
169 according with PsbO1 sequence (*SI Appendix, Table S2*). Nevertheless, the local resolution of

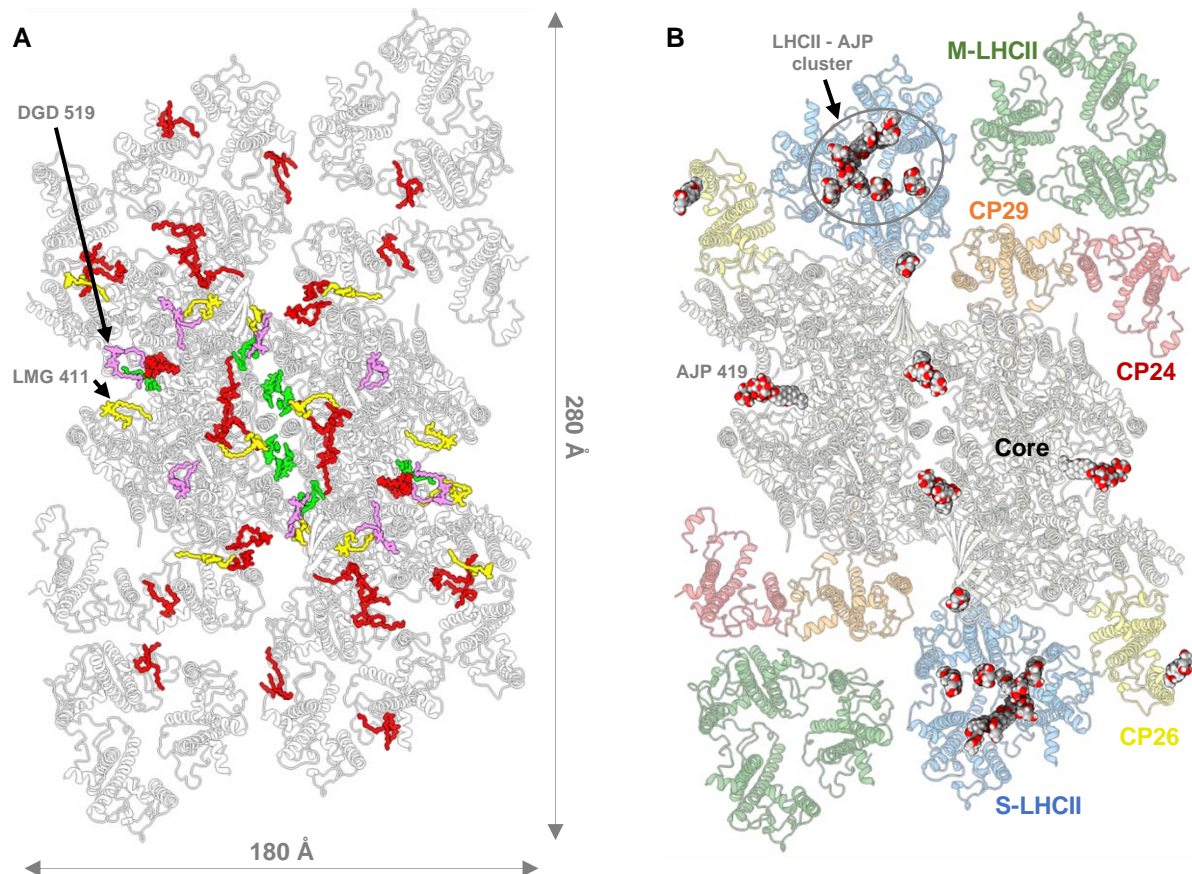

**Figure 2** – **A**, Distribution of the lipids in Arabidopsis PSII, as seen from the lumenal side: monogalactosyldiacylglycerol (MGDG/LMG, in yellow), digalactosyldiacylglycerol (DGDG/DGD, in violet), sulfoquinovosyldiacylglycerol (SQDG/SQD, in green) and phosphatidylglycerol (PG/LHG, in red). **B**, Distribution of the modelled digitonin molecules (ligand code: AJP) in our PSII supercomplex, as seen from the lumenal side. The secondary structure of the protein backbones are represented in cartoon style and the detergent molecules represented by spherical atomic representation.

170 our EM corresponding to PsbO is lower than the PSII core, suggesting that the entire protein  
171 has some flexibility or that a lesser percentage of PSII supercomplexes may indeed bind the  
172 PsbO2 isoform.

173 The analysis of individual 2D and 3D classes, the detection of PsbTn with low occupancy, and  
174 the absence of PsbP, PsbQ and the neighbouring transmembrane protein PsbR, suggest that  
175 the binding of these proteins is highly sensitive to small protocol variations. PsbP, PsbQ and  
176 PsbR subunits were also reported missing in the previous Arabidopsis PSII model and in the  
177 unstacked model of Pea PSII. The absence of these proteins is probably owing to thylakoid  
178 membrane solubilizations performed at pH 7.5 using high concentrations of  $\alpha$ -DDM or lower  
179 concentrations of DDM with additional digitonin detergents (*SI Appendix, Table S5*).

180 In contrast to the previous medium-resolution Arabidopsis PSII cryo-EM structure from PsbS  
181 knock-out mutant (32), the hereby presented atomic model is the first PSII structure derived  
182 from wild-type phenotype of *Arabidopsis thaliana*. Although the PsbS protein was present in  
183 the starting sample, we were not able to detect any density corresponding to this protein in  
184 any of the investigated 2D projections or the final EM map. Thus, the location of the enigmatic  
185 energy quenching (42) PsbS protein remains to be determined.

186 Of the major antennae complexes, we identify two strongly bound LHCII (S-LHCII) and two  
187 moderately bound (M-LHCII). S-LHCII contains three monomers A, B and C (S-LHCII<sub>A</sub>, S-  
188 LHCII<sub>B</sub> and S-LHCII<sub>C</sub>); these are within exciton energy transfer (EET) distance ( $\sim 20\text{\AA}$ ) to other  
189 PSII subunits at four different places, S-LHCII<sub>B</sub> to CP26, S-LHCII<sub>A</sub> to CP43 and CP29, and S-  
190 LHCII<sub>C</sub> to the adjacent M-LHCII<sub>1</sub> (*SI Appendix, Fig. S5 and Table S6*), which probably explains  
191 the strongly bound features of this LHCII subunit.

192 In general, the region around M-LHCII trimers and CP24 could not be easily resolved due to  
193 the: higher flexibility of this region in relation to the core of the complex; diminished  
194 occupancy arising from the heterogeneity of the sample with an unquantifiable number of  
195 C<sub>2</sub>S<sub>2</sub> particles present in our dataset; destabilisation caused by the used detergent mix. The  
196 low resolution of the M-LHCII-CP24 region, did not allow to determine which of the *lhcb1*,  
197 *lhcb2* or *lhcb3* gene product (43) correspond to which LHCII monomer. M-LHCII trimers—  
198 monomers modelled according to Lhcb3 protein sequence—and associated CP24 protein were



199 placed into their respective densities. Besides their relative location to the core, detailed  
200 structural information cannot be inferred from the current EM map thus, ligands were only  
201 modelled for unequivocal densities. We note that divergences at the sequence level may occur  
202 since our EM map does not present resolved side-chain densities for the M-trimer Lhcb  
203 proteins.

204

### 205 **The peripheral low molecular mass proteins of the PSII core**

206 Three low molecular mass proteins, PsbW, PsbH and PsbZ, were found located in-between  
207 the PSII core and the antenna complexes (**Figure 1**). The PsbW protein links the LHCI  
208 monomer A to CP43 (44); meanwhile, the PsbH is bridging the CP29 to CP47, and the PsbZ  
209 bridging the CP26 to the CP43 protein. As none of them has been shown to bind any pigment,  
210 likely, they are not directly involved in energy transfer from the antenna to the reaction centre.  
211 Thus, suggesting that their primary function is to support the association of the antennae to  
212 the core of the PSII complex and as such, they can be critical regulators of the antennae size in  
213 the adaptation to changing light conditions.

214 The well-resolved side chains densities for the PsbW protein enabled us to: fully fit the N-  
215 terminal tail and model its remaining residues; and address the unknown structure of its C-  
216 terminus (**Figure 3**). We concluded that the N-terminal tail was misplaced in the previous  
217 medium-resolution PSII model and identified the amino acids PsbW-Asn99, PsbW-Trp103,  
218 and LHC<sub>A</sub>-Asn122 (*SI Appendix, Fig. S8*), as being the potential motifs that anchor the S-LHCI  
219 trimer to PsbW through electrostatic interactions.

220 PsbW is suggested to interact with the PsbH subunit of the opposite PSII monomer and in this  
221 way participate in the stabilisation of the PSII dimer (45). This interaction of electrostatic  
222 nature is supported by our finding that the negatively charged C-terminal tail of the PsbW  
223 protein and the positively charged N-terminal tail of PsbH are both on the stromal side close  
224 to each other. Phosphorylation of PsbH would in this case hinder such interaction, triggering  
225 the disassembly of PSII and preparing it for repair (46). Although the C-terminal tail of PsbW  
226 adopts a conformation that follows in the opposite direction of PsbH, this possibility cannot

227 be excluded since no cryo-EM map of higher plant PSII model was able to resolve the 12 amino  
228 acids of PsbH N-terminal tail.

229 We used the sequence motif PSLK (Pro81-Lys84) of the PsbX protein and the corresponding  
230 side chains densities, to correctly place the subunit and resolve four additional amino acids of  
231 its N-terminus (*SI Appendix, Fig. S9*). Our placement of PsbX is shifted four to five amino acids  
232 ( $\approx 7.9 \text{ \AA}$ , alpha-carbon shift) towards the stromal side compared to the previous medium-  
233 resolution Arabidopsis PSII model.

234 The PsbJ protein is one of the most hydrophobic proteins in the thylakoid membrane and has  
235 been suggested to be involved in the electron flow within PSII (47) even though it does not  
236 seem to bind any pigment or cofactor. It is found in Pea and Spinach structures (19, 21) bound  
237 to the PSII complex through hydrogen bonding with lipids associated with CP43 protein, but  
238 neither found in our Arabidopsis PSII structure, nor in the 5MDX model. Regarding the PsbY  
239 protein, we do not detect any densities suggesting the presence of this low molecular mass  
240 subunit—as for the PSII models of Spinach (3JCU) and Pea (5XNM and 5XNL)—even when  
241 western-blotting analysis show that the protein is present in various PSII samples from higher

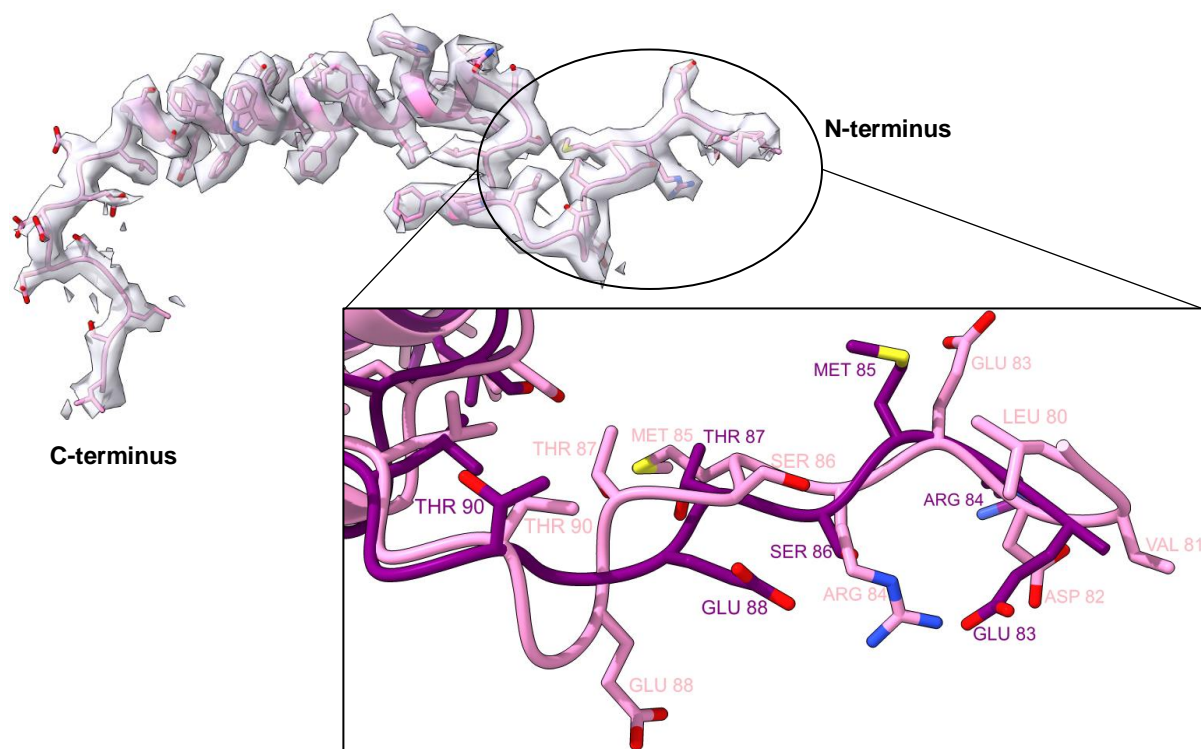

**Figure 3** – The low molecular weight protein PsbW fit into its respective density. Inset: Dissimilar modelling of the N-terminus of PsbW between #??? and 5MDX (purple) Arabidopsis PSII models

242 plants including Arabidopsis (48). So far, the structure of the PsbY subunit has only been  
243 observed on cyanobacterial PSII models (28), which in higher plants C<sub>2</sub>S<sub>2</sub>M<sub>2</sub>-type PSII would  
244 be located on the outskirts of the complex (considering a conserved position). The small  
245 proteins PsbY and PsbJ are both hydrophobic, have a single transmembrane helix and are  
246 suggested to exist in the outskirts of the complex, thus likely to be dissociated from the  
247 complex in the presence of detergents.

248

### 249 **Digitonin destabilizes several oligomerization interfaces between PSII proteins**

250 The superposition of Pea and Spinach PSII structures to our PSII model reveals that the  
251 distance between the two PSII monomeric cores is longer in Arabidopsis PSII. This is probably  
252 explained due to the presence of two digitonin molecules at the monomer-monomer interface,  
253 affecting the intermonomer distance (**Figure 4** and *SI Appendix, Fig. S10-11*). However, the  
254 stability of the dimer does not seem to be affected as the purification of a homogenous sample  
255 of dimerised PSII was possible.

256 Digitonin molecules have a hexacyclic structure—a lipophilic steroidal sapogenin (49)—that  
257 grants partial rigidity to the molecule and result in a high-level of occupancy in the EM map  
258 (*SI Appendix, Fig. S7*). In contrast, the hydrophilic oligosaccharide chains of digitonin stick  
259 outside the membrane plane leading to a higher degree of flexibility becoming practically  
260 unresolved.

261 The broadly accessible luminal pocket at the centre of each S-LHCII trimer contains at least  
262 seven digitonin molecules (*SI Appendix, Fig. S12*) that destabilise the natural configuration of  
263 the LHCII complexes. We found that the LHCII trimers lack the violaxanthin pigments—  
264 ligand code XAT1622—reported to be located at the interface between the monomers (19, 21).  
265 In each Lhcb monomer, a digitonin molecule was found to disrupt the interaction between the  
266 violaxanthin terminal ring located on the inner side of the LHCII trimer and the chlorophyll *b*  
267 CHL607. The opposite terminal ring of the violaxanthin molecule—facing the outside-side of  
268 the LHCII trimer—is known to interact with the phosphatidylglycerol (PG) lipid LHG2630.  
269 Studies show that LHG2630 plays an essential role in the trimerization of Lhcb proteins (50).  
270 Our EM map indicates that the hydrophobic chains of LHG2630 adopt a new conformation

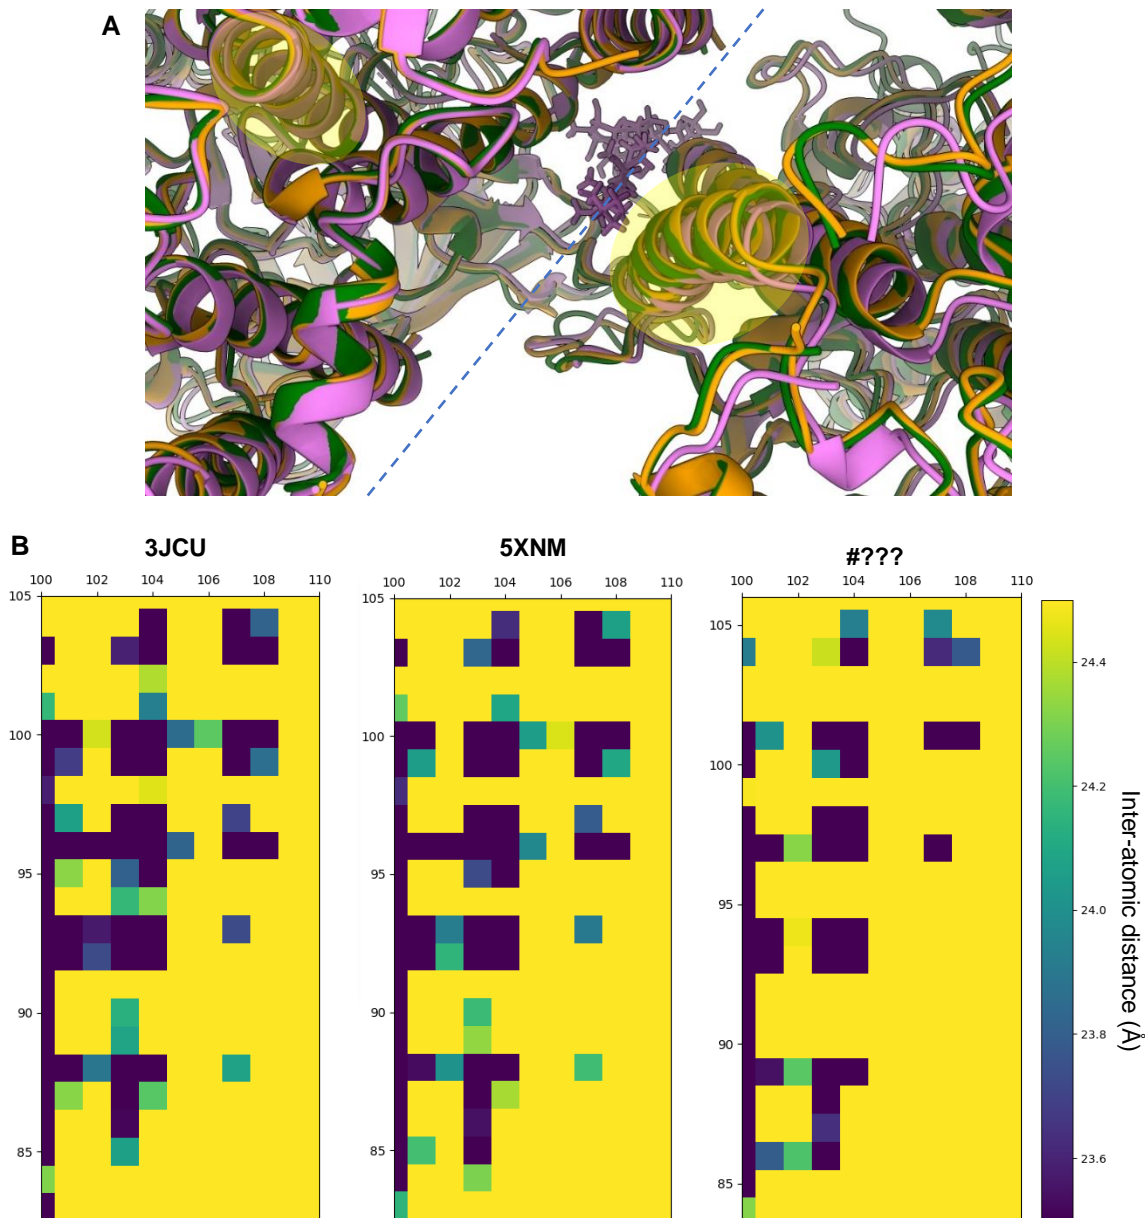

**Figure 4** – A, Dimerization interface between monomeric PSII cores: 3JCU in green, 5XNM in orange, #??? in violet. A, models aligned to D1 protein of the same monomer (to the left of the dashed line) B, Heatmaps reporting the calculated intermonomer  $C\alpha$ - $C\alpha$  atomic distances, for each high-resolution higher plant PSII model, between  $\alpha$ -helix B of the D1 protein (xx axis) and  $\alpha$ -helix B of the CP47 protein from the opposite PSII monomer (yy axis)—highlighted in A.

271 while the molecule remains tightly bound to the complex (*SI Appendix, Fig. S12*). This  
272 interaction is sustained by hydrogen-bonds and an ionic interaction between the PG head  
273 group and the amino acids Tyr78 and Lys217, respectively. Our structural data confirms that  
274 this phospholipid is essential to bind the adjacent chlorophyll *a* molecule CLA611 through  
275 coordination between its phosphodiester group and the chlorophyll central magnesium atom.  
276 Studies of PSII dimerization show that the trans-hexadecanoic fatty acid chains of PG and not

277 its phosphodiester group are the essential factor at the oligomerisation interface (51). Our  
278 finding suggests that one should not infer the same conclusions for PG lipids at other positions  
279 of the PSII complex. The head group of LHG2630 lipids is crucial to ligate CLA611 and to  
280 stabilise the monomer-monomer interfaces in LHCII.

281 Further investigation of our EM map allowed us to observe that a digitonin molecule occupies  
282 the binding site of the digalactosyldiacylglycerol (DGDG) lipid DGD520 found in Pea and  
283 Spinach PSII (**Figure 2B**). Due to the loss of interaction with DGD520, the neighbouring  
284 galactolipid DGD519 has a high degree of flexibility. In Pea PSII, DGD519 hydrogen-bonds  
285 with DGD520 and the CP43 loop E (Leu401-Ala416), which explains the flexibility of this loop  
286 (**Figure 5**). Furthermore, the digitonin-replaced lipid, DGD520, is responsible to mediate the  
287 connection between the PsbJ C-terminus and the PSII core through hydrogen-bond  
288 interactions. This structural finding can explain the loss of PsbJ subunit in our structure.

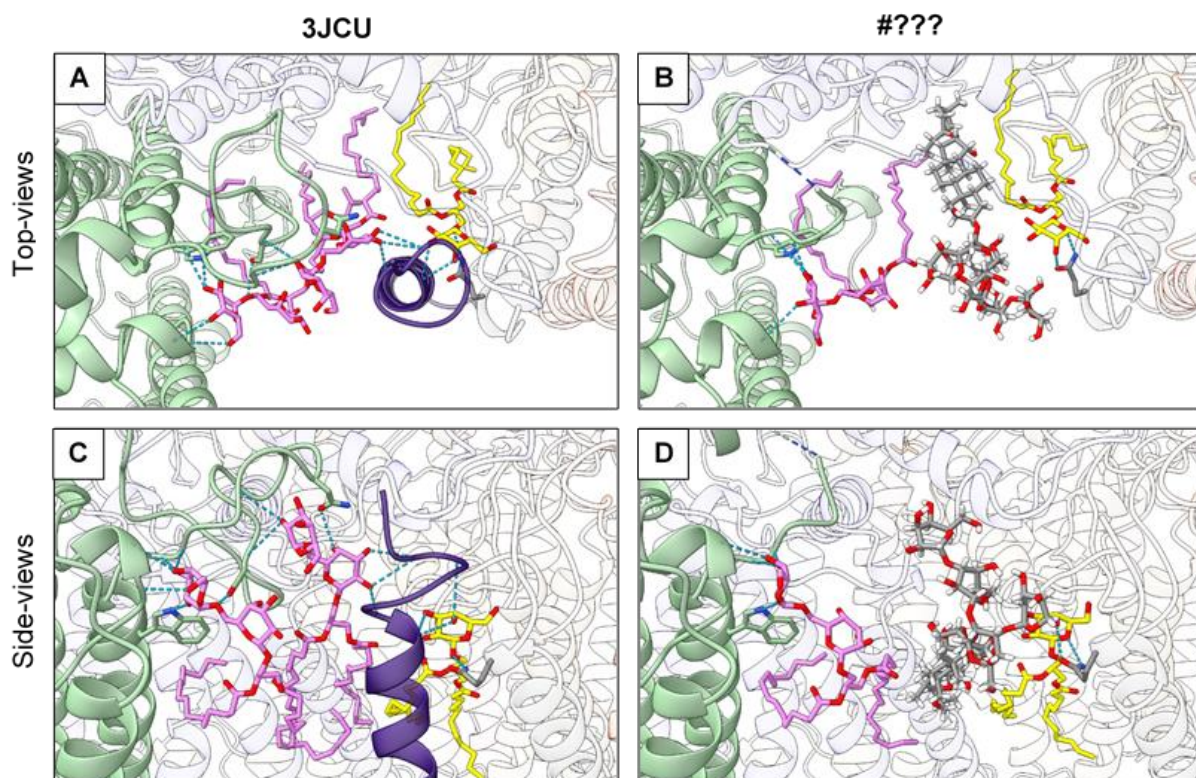

**Figure 5** – Hydrogen-bonding between loop E of CP43 and PsbJ subunit are mediated by MGDG and PG lipids and disrupted by a digitonin molecule. A and B are top-views, while C and D represent views along the membrane plane, centered around the DGD520 lipid present in 3JCU, but replaced by a digitonin molecule in #???. Hydrogen-bonds are represented by dashed blue lines and the interrupted loop E of CP43 is represented by a dashed-line half-colored in blue (N-terminus) and green (C-terminus).

289 It should be noted that the cofactors LHG2630, XAT1622, DGD519 and DGD520 were not  
290 observed in the 5MDX model.

291

## 292 **The PsbO short-loop is disordered as result of the digitonin bound between PSII** 293 **monomers**

294 The extrinsic protein PsbO has two omega loops—here termed short-loop (Ala154 to Pro156)  
295 and long-loop (Ser239 to Ala279)—to which structural information have been difficult to  
296 obtain for Arabidopsis PSII (*SI Appendix, Fig. S13*). In Spinach PSII (21), which retains the  
297 extrinsic PsbP and PsbQ proteins, both loop regions are well structured. The unstacked PSII  
298 structure from Pea (PDB: 5XNM) has the short-loop modelled but the long-loop, which is  
299 contiguous to PsbP in Spinach PSII and in Pea stacked PSII (PDB: 5XNL) models, is absent.

300 The increased quality of our EM map revealed three additional amino acids in the short-loop  
301 N-terminal with a conformation dissimilar to their counterpart amino acids in Pea and  
302 Spinach models. The amino acid sequence of the short-loop peptide is the poorest conserved  
303 region of the PsbO protein among higher plants (*SI Appendix, Fig. S14*), suggesting that this  
304 flexible region is of lower functional relevance. Nevertheless, it is conserved to a higher degree  
305 in Spinach and Pea, while being the least conserved in Arabidopsis PsbO, justifying the  
306 diverged structural arrangement (Asn153-Glu157, *SI Appendix, Fig. S15*) of the peptide  
307 backbone including the newly modelled amino acids. The hydrophilic sugar chains of the  
308 digitonin molecules harboured between PSII monomers are within no distance to interact with  
309 PsbO short-loop, and thus could be the reason for its disorder.

310 To note that we do not exclude the possibility that an even larger number of detergent  
311 molecules are bound to the complex, even if they cannot be observed due to their high  
312 flexibility.

313 **The disordered PsbO long-loop is related to several structural changes at the OEC**

314 In the here presented PSII structure, the C-terminus of the D2 protein was found to be twisted  
315 (*SI Appendix, Fig. S16*) in a similar manner to what was reported for the cyanobacterial  
316 *Synechocystis* Apo-PSII (39)—making the last C-terminal residues occupy the region where the  
317 otherwise ordered PsbO long-loop would be located.

318 The PsbO-Asp243 (Asp158, according to 5XNM sequence numbering) is a residue of PsbO  
319 long-loop known to participate in a hydrogen-bonding network that connects the Mn<sub>4</sub>CaO<sub>5</sub> to  
320 the lumen and stabilise the binding of PsbP and PsbQ proteins (52). Interestingly, the 5XNM  
321 model presents the long-loop modelled to a higher extent (six additional amino acids at the  
322 C-terminus, including Asp158). Our analyses of hydrogen-bonding protein-protein  
323 interactions of the 5XNM model show that Asp158 and Leu157 hydrogen-bond residues D1-  
324 Arg334 and D1-Asn335, respectively. These interactions are responsible to maintain the  
325 structure of the D1 C-terminal and consequently keep the Mn<sub>4</sub>CaO<sub>5</sub> in its correct position.

326 Considering that the long-loop region of PsbO is highly conserved in almost all higher plants,  
327 we can assume that the observed disorder in Arabidopsis PSII models is linked to the loss of  
328 the extrinsic proteins PsbP and PsbQ. Nevertheless, it is unclear why the C-terminus of the  
329 D2 protein in our PSII structure is twisted and why the unstacked PSII from Pea has a more  
330 ordered PsbO long-loop, and a structured D1 C-terminus capable of binding the inorganic  
331 cluster. We hypothesize that both observations are correlated to each other, and a possible  
332 consequence of the use of digitonin as a solubilization agent.

333 As suggested, the low molecular mass protein PsbJ might be required to stably bind PsbR,  
334 which in turn is responsible for protecting PsbP and PsbQ from proteolytic degradation (53).  
335 PsbO is known to be the most stable extrinsic protein, weakly sensitive to the depletion of the  
336 neighbouring PsbP and PsbQ proteins. We anticipate that the PsbO long-loop requires PsbP  
337 to maintain its stability, which is correlated with the loss of the transmembranar subunits PsbJ  
338 and PsbR, and the extrinsic proteins PsbP and PsbQ. Furthermore, the oxygen-evolving  
339 proteins PsbP and PsbQ are pH-sensitive (19), and both proteins bind the strongest to the PSII  
340 lumen side around pH 6 (30). Unfortunately, PSII complexes tend to aggregate at pH 6,  
341 obstructing single-particle cryo-EM studies. The isolation of PSII complexes at pH 6 using

342 alternatives to detergents, such as amphiphilic (17) or styrene-maleic acid (SMA) copolymers  
343 forming membrane proteins embedded in nanodiscs, might offer a solution to these  
344 challenges. Not less crucial, such copolymers would protect PSII from the undesirable effects  
345 of detergents and allow to extract PsbJ (and possibly PsbR and PsbY) bound to PSII.

346

### 347 **The OEC in the absence of PsbP and PsbQ proteins**

348 The  $Mn_4CaO_5$  cluster is coordinated by crucial amino acids of the D1 protein and the core  
349 antennae protein CP43, often referred to as “first shell” residues. Amino acids from the D2  
350 protein and the inner antenna CP47 are essential “second shell” residues that sustain the  
351 structure of the OEC and form the channels which deliver  $H_2O$  molecules to the water  
352 oxidation cluster. The extrinsic subunits are known to stabilise the hydrophilic pocket that  
353 hosts the inorganic cluster. Comparing our model to the 3JCU mature PSII structure  
354 containing the extrinsic proteins and the Mn cluster, we found that in the absence of PsbP and  
355 PsbQ proteins, the  $Mn_4CaO_5$  binding pocket undergoes conformational changes. Without the  
356 presence of the  $Mn_4CaO_5$  cluster, the C-terminal tail of the D1 protein (amino acids His337-  
357 Ala344) was found to be disordered and therefore not visible in our EM map. Out of the seven  
358 amino acid that ligate to  $Mn_4CaO_5$ , only two, D1-Asp170 and D1-Glu189, retain their relative  
359 positions to the mature Spinach PSII structure (**Figure 6A**). D1-Glu329 adopts an unusual  
360 conformation, where it is found to hydrogen bond with D1-His332. Glutamate 333 of the D1  
361 protein, one of the coordinating residues of the manganese cluster, is consequently in a  
362 different conformation (**Figure 6B**) and hydrogen-bonded to D1-Glu329. The C-terminus of  
363 the D1 protein (amino acids 337-344) is disordered and not visible in our EM map.

364 The core antenna protein CP43 consists of six transmembrane helices connected by short loops  
365 (loop A-D) and a very large extrinsic domain known as loop E. Glutamate 354 and arginine  
366 357, also ligands of the  $Mn_4CaO_5$ , are part of loop E. Both amino acids nearly conserve their  
367 position relative to mature PSII (**Figure 6A**). The PsbO seems to play an essential role in  
368 stabilising the CP43 loop E—connected by 10 interprotein hydrogen bonds—that otherwise  
369 would have high degree of flexibility. Finally, near the water oxidation cluster binding site,  
370 loop E is stabilised via hydrogen bonds between CP43-Arg357 and D1-Asp170. A careful



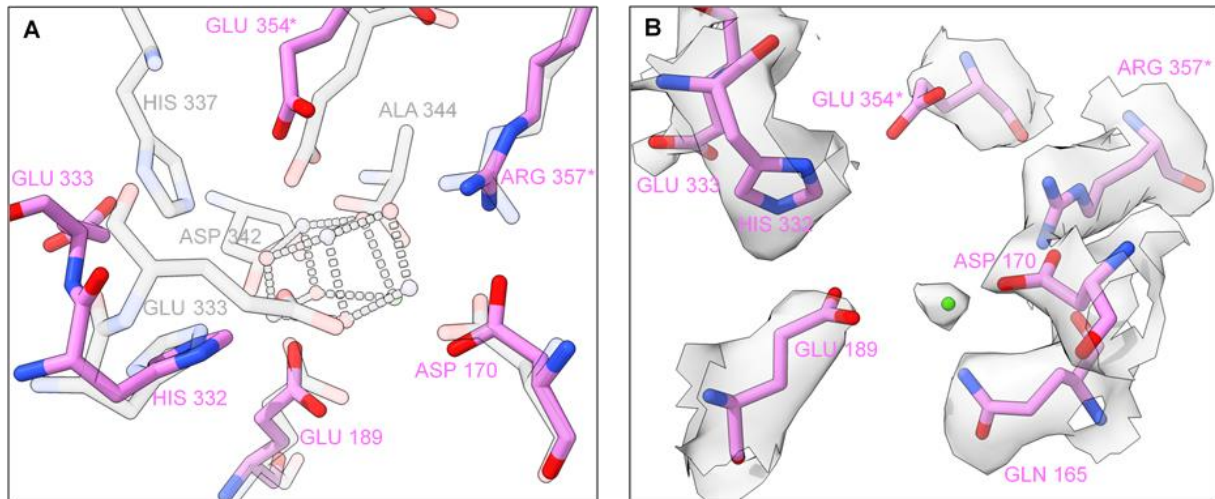

**Figure 6** - The manganese cluster binding site. A, Amino acid ligands to  $Mn_4CaO_5$ : Spinach PSII (3JCU, transparent grey) superimposed to Arabidopsis PSII (pink). To avoid double labelling, the overlapping residues of 3JCU are not identified for clarity. B, Arabidopsis amino acid ligands to  $Mn_4CaO_5$  fit into their respective densities and an extra density attributed to a positive metal ion (in our structure modelled as manganese). \*Identifies the amino acids belonging to the CP43 protein, while the remaining apply to the D1 subunit.

371 analysis reveals that CP43-Glu354 is slightly receded from its coordinating position to Mn2  
372 and Mn3 of the  $Mn_4CaO_5$ , but pre-organised to receive and coordinate the manganese ions  
373 (**Figure 6A**). At the expected position of  $Ca^{2+}$  ion on a mature PSII structure, we find a density  
374 that can be attributed to a positively charged ion (**Figure 6B**), potentially coordinated by the  
375 D1 residues Gln165 (also retaining its position related to mature PSII), Asp170 and Glu189.  
376 EM data by itself offers no signifying conclusion regarding the identity of the metal ion, which  
377 could be a  $Ca^{2+}$  ion, or the first manganese ion that binds to PSII to form the  $Mn_4CaO_5$ . If the  
378 latter is true, this binding site might well be the long sought high-affinity site of PSII oxygen-  
379 evolving complex.

380

## 381 Conclusion

382 In this work, we presented the first high-resolution structure of Photosystem II from wild-  
383 type *Arabidopsis thaliana*, allowing a detailed comparison to other higher plants' PSII  
384 structures, while fairer comparison to existing high-resolution cyanobacterial PSII models.  
385 The quality of the obtained EM map enabled a better and more comprehensive modelling of  
386 most of the PSII core proteins; a detailed analysis of the positioning of chlorophyll; carotenoid

387 and lipid molecules; and the placement of water molecules, of which some compose the water  
388 channels delivering substrate to the catalytic site of this water-splitting enzyme.

389 To isolate PSII, we solubilised thylakoid membranes with a detergent mixture containing  $\beta$ -  
390 DDM—a harsher isoform of the more commonly used  $\alpha$ -DDM (31)—and digitonin. Even  
391 though  $\beta$ -DDM can be a more disruptive detergent hindering the obtention of large PSII  
392 supercomplexes, we did not find evidence of any structural changes caused by it. Instead, we  
393 found that digitonin molecules disrupt several regions of PSII by replacing lipids that keep  
394 the structural integrity of the membrane protein complex. Exploiting the digitonin effects on  
395 the major antennae, we found that the PG phosphodiester group is the essential lipid element  
396 to stabilise the trimerization of LHCII complexes. Furthermore, we found that digitonin  
397 molecules are responsible for: the loss of the PsbJ subunit; the consequent instability of a CP43  
398 loop; the disordered D1 C-terminus and the resultant fall of the  $Mn_4CaO_5$  cluster. Thus, our  
399 model is a representation of the disruptive mechanisms that detergent molecules can have in  
400 the stability of protein complexes, leading to a dramatic loss of function.

401 In comparison to other PSII structures, new knowledge on the assembly of the OEC from  
402 higher plants can possibly be derived from our model which exhibits similar characteristics  
403 to PSII still in assembly stage, prior to the binding of the extrinsic PsbP and PsbQ: the  
404 monomeric *Synechocystis* apo-PSII (39) presents analogous features to the high-resolution  
405 Arabidopsis PSII, particularly at the  $Mn_4CaO_5$  binding-site.

406 These findings allow us to step forward in PSII research and bring new research questions:  
407 Could the detergent molecules anchored inside the moiety of isolated chlorophyll-binding  
408 proteins alter their spectroscopic properties; how has that influenced the outcomes of different  
409 PSII and LHCII spectroscopical studies; and if digitonin molecules fit into the centre of the  
410 LHCII trimer, did they replace other naturally present molecules such as yet undetermined  
411 lipids at those positions?

## 412 **Methods**

### 413 **Photosystem II supercomplex extraction**

414 Wild type *Arabidopsis thaliana* (ecotype Col-0) plants were grown for 8 weeks under controlled  
415 temperature and humidity conditions and with a light period of 8 hours per day.

416 Plants were harvested after a dark period of 16 h and BBY membranes (40) prepared according  
417 to Chen et al. (54) The extraction of PSII C<sub>2</sub>S<sub>2</sub>M<sub>2</sub> complexes was performed according to Crepin  
418 et al. (30) with the following modifications: solubilisation was performed by adding a  
419 detergent mixture of 0.2%  $\beta$ -DDM and 1% digitonin, followed by a 30 min dark incubation at  
420 4°C.

421

### 422 **Sample preparation and electron microscopy**

423 For cryo-electron microscopy, solubilised PSII sample was concentrated to 1 mg/ml Chl using  
424 an Amicon Ultra 30k centrifugation filter (Millipore). 4  $\mu$ l concentrated sample was applied  
425 to glow-discharged (30 s at 50 mA) Quantifoil R 1.2/1.3 Cu 300 grids (Quantifoil Micro Tools)  
426 and grids were plunge frozen in liquid ethane using an FEI Vitrobot MkIV (Thermo Fisher  
427 Scientific) at 100% humidity, 4°C, using a blot force of -5, wait time of 1 second, and blotting  
428 time of 5 seconds. Automated data collection was performed using EPU software on a Titan  
429 Krios G2 transmission electron microscope (Thermo Fisher Scientific) operated at 300 kV,  
430 equipped with a Gatan K2 Summit direct electron detector and Gatan Quantum GIF energy  
431 filter at the Umeå Core Facility for Electron Microscopy, a node of the Swedish National Cryo-  
432 EM facility. In total 12227 movies, fractionated in 40 frames, were collected at a pixel size of  
433 0.82 Å, total dose of 59.7 e<sup>-</sup>/Å<sup>2</sup> and defocus range of -1.5 to -3.0  $\mu$ m. On the same microscope  
434 and grid, a data set was collected using Volta phase plate (55): in total 3585 movies,  
435 fractionated in 40 frames, were collected at a pixel size of 1.09 Å, total dose of 36.7 e<sup>-</sup>/Å<sup>2</sup> and  
436 defocus of -0.7  $\mu$ m.

437

## 438 **Cryo-EM data processing, model building and refinement**

439 The collected datasets were processed using the software package cryoSPARC (56) (version  
440 v2.15).

441 VPP dataset: Automated particle picking based on 116 manually picked templates was carried  
442 out before the major 2D classification round. The combination of well-resolved 2D classes  
443 isolated a subset of 80456 particles, out of 273202 particles automatically picked. The *ab-Initio*  
444 3D reconstruction strategy segregated particles into 2 different 3D-classes, allowing us to  
445 proceed with one class of a more homogeneous set of 56322 particles. Homogeneous  
446 refinement of the preliminary 3D volume was carried with imposed C2 symmetry, yielding a  
447 3D reconstruction with an estimated average resolution of 3.6 Å.

448 High-resolution data set: Template-free automated particle picking was carried out before the  
449 major 2D classification round. From the selected 2D classes we restricted the data set to a total  
450 of 110 659 particles, out of 416 262 particles automatically picked. The *ab-Initio* 3D  
451 reconstruction strategy segregated particles into 4 different 3D-classes, allowing us to proceed  
452 with a more homogeneous subset of 100 712 particles. The selected particles were individually  
453 motion-corrected, and homogeneous refinement of the preliminary 3D volume was carried  
454 with imposed C2 symmetry. After a round of per-particle CTF refinement, the final  
455 homogeneous refinement yielded a 3D reconstruction with an estimated average resolution  
456 of 2.79Å, using the gold standard FSC (*SI Appendix, Fig. S1*).

457 Three independent post-processing methods were applied to the resultant high-resolution  
458 electrostatic potential map: local sharpening with Phenix Autosharpen tool (57) (Phenix v1.18.2);  
459 density modification with Phenix denmod tool (58) (Phenix v1.18.2) using the outputted half-  
460 maps by cryoSPARC; application of the negative of the Laplacian operator using Chimera (59)  
461 (version 1.14).

462 For model building, the previous Arabidopsis atomic model 5MDX was manually docked and  
463 each chain morph-fitted to the 2.79 Å map using COOT (60) (version 0.92). The new cofactors  
464 and the PsbTn subunit were found using the 5XNM Pea PSII model as a template. Overall  
465 the presented model was manually refined using COOT and both the high-resolution and the

466 VPP dataset, and automatically refined with Phenix Real-space refinement tool (61) (Phenix  
467 v1.18.2).

468

## 469 **Comparative analysis and preparation of figures**

470 Molecular graphics and analyses were performed with UCSF ChimeraX (62) (version 1.1),  
471 developed by the Resource for Biocomputing, Visualization, and Informatics at the University  
472 of California, San Francisco. Surface electrostatics were calculated using the software  
473 packages PDB2PQR (to assign atomic charges and radii to the protein backbone using force  
474 field parameters) and APBS (to generate the electrostatic surface) (63). We recommend  
475 ChimeraX for model and surface visualisation.

476

## 477 **Data availability**

478 The raw multi-frame micrographs of the higher-resolution data set and the VPP dataset were  
479 deposited in the Electron Microscopy Public Image Archive with accession codes EMPIAR-  
480 ##### and EMPIAR-#####, respectively. Electrostatic potential maps used for refinement,  
481 unsharpened EM map, half-maps and other relevant post processed maps have been  
482 deposited in the Electron Microscopy Data Bank, EM-#####. The modelled structure is available  
483 in the Protein Data Bank (PDB) under the accession code #???.

484

## 485 **Acknowledgements**

486 The authors thank to Dr Johannes Messinger, Dr Thomas Kieselbach and Dr Domenica Farci  
487 for reviewing the manuscript. This work was supported by grants from the Carl Trygger  
488 foundation to WPS, and the Swedish Research Council (VR), grant 2016-05009 to KP. The data  
489 was collected at the Umeå Core Facility for Electron Microscopy, a node of the Cryo-EM  
490 Swedish National Facility, funded by the Knut and Alice Wallenberg, Family Erling Persson  
491 and Kempe Foundations, SciLifeLab, Stockholm University and Umeå University.

492

## 493 **Author contributions**

494 A.T.G. and W.P.S. designed research; A.T.G performed sample preparation, data processing,  
495 and model building; A.T.G and M.H. performed cryo-EM data collection; A.T.G and W.P.S.  
496 wrote the paper; M.H. and K.P. assisted model building and writing of the paper.

497

## 498 **Significance Statement**

499 The mechanisms of the assembly of plants Photosystem II of plants and its oxygen evolving  
500 complex assembly is not yet fully understood. Here we describe the observations made on the  
501 first high-resolution PSII structure of Arabidopsis thaliana, isolated using a protocol to extract  
502 partly disordered supercomplexes. From this model we draw important conclusions on the  
503 function of numerous cofactors and regions that assist the stabilization of PSII, while reporting  
504 the harmful effects of digitonin as a detergent for isolation of allegedly intact PSII  
505 supercomplexes. The presented findings allow for a completer understanding of the  
506 assembly/disassembly mechanism of PSII. Furthermore, this atomic model consents a fairer  
507 comparison between the available higher plants' PSII structures.

## References

- 509 1. A. Stirbet, D. Lazár, Y. Guo, G. Govindjee, Photosynthesis: basics,  
510 history and modelling. *Ann. Bot.* **126**, 511–537 (2020).
- 511 2. C. L. Beadle, S. P. Long, Photosynthesis — is it limiting to biomass  
512 production? *Biomass* **8**, 119–168 (1985).
- 513 3. G. S. Tkemaladze, K. A. Makhshvili, Climate changes and  
514 photosynthesis. *Ann. Agrar. Sci.* **14**, 119–126 (2016).
- 515 4. M. Koornneef, D. Meinke, The development of Arabidopsis as a  
516 model plant. *Plant J.* **61**, 909–921 (2010).
- 517 5. P. Poczai, I. Cernák, I. Varga, J. Hyvönen, Analysis of the genome  
518 sequence of the flowering plant Arabidopsis thaliana. *Genet.  
519 Resour. Crop Evol.* **61**, 796–815 (2014).
- 520 6. Govindjee, J. F. Kern, J. Messinger, J. Whitmarsh, ‘Photosystem II’  
521 in *Encyclopedia of Life Sciences*, (John Wiley & Sons, Ltd, 2010)  
522 <https://doi.org/10.1002/9780470015902.a0000669.pub2>.
- 523 7. D. J. Simpson, D. Von Wettstein, The structure and function of the  
524 thylakoid membrane. *Carlsberg Res. Commun.* **54**, 55–65 (1989).
- 525 8. P. Cao, *et al.*, Structure, assembly and energy transfer of plant  
526 photosystem II supercomplex. *Biochim. Biophys. Acta - Bioenerg.*  
527 **1859**, 633–644 (2018).
- 528 9. J. Barber, E. Morris, C. Büchel, Revealing the structure of the  
529 photosystem II chlorophyll binding proteins, CP43 and CP47.  
530 *Biochim. Biophys. Acta - Bioenerg.* **1459**, 239–247 (2006).
- 531 10. S. Caffarri, R. Kouřil, S. Kerešič, E. J. Boekema, R. Croce,  
532 Functional architecture of higher plant photosystem II  
533 supercomplexes. *EMBO J.* **28**, 3052–3063 (2009).
- 534 11. J. Nield, J. Barber, Refinement of the structural model for the  
535 Photosystem II supercomplex of higher plants. *Biochim. Biophys.  
536 Acta - Bioenerg.* **1757**, 353–361 (2006).
- 537 12. G. Jackowski, K. Kacprzak, S. Jansson, Identification of  
538 Lhcb1/Lhcb2/Lhcb3 heterotrimers of the main light-harvesting  
539 chlorophyll a/b-protein complex of Photosystem II (LHC II).  
540 *Biochim. Biophys. Acta - Bioenerg.* **1504**, 340–345 (2001).
- 541 13. S. Caffarri, R. Croce, L. Cattivelli, R. Bassi, A look within LHCII:  
542 Differential analysis of the Lhcb1-3 complexes building the major  
543 trimeric antenna complex of higher-plant photosynthesis.  
544 *Biochemistry* **43**, 9467–9476 (2004).
- 545 14. E. J. Boekema, H. Van Roon, F. Calkoen, R. Bassi, J. P. Dekker,  
546 Multiple types of association of photosystem II and its light-  
547 harvesting antenna in partially solubilized photosystem II  
548 membranes. *Biochemistry* **38**, 2233–2239 (1999).
- 549 15. R. Tokutsu, N. Kato, K. H. Bui, T. Ishikawa, J. Minagawa, Revisiting  
550 the supramolecular organization of photosystem II in  
551 *Chlamydomonas reinhardtii*. *J. Biol. Chem.* **287**, 31574–31581 (2012).
- 552 16. L. Shen, *et al.*, Structure of a C2S2M2N2-type PSII-LHCII  
553 supercomplex from the green alga *Chlamydomonas reinhardtii*.  
554 *Proc. Natl. Acad. Sci. U. S. A.* **116**, 21246–21255 (2019).
- 555 17. R. N. Burton-Smith, *et al.*, Structural determination of the large  
556 photosystem II-light-harvesting complex II supercomplex of  
557 *Chlamydomonas reinhardtii* using nonionic amphipol. *J. Biol.  
558 Chem.* **294**, 15003–15013 (2019).
- 559 18. L. X. Shi, W. P. Schröder, The low molecular mass subunits of the  
560 photosynthetic supracomplex, photosystem II. *Biochim. Biophys.  
561 Acta - Bioenerg.* **1608**, 75–96 (2004).
- 562 19. X. Su, *et al.*, Structure and assembly mechanism of plant C2S2M2 -  
563 type PSII-LHCII supercomplex. *Science (80-.)* **357**, 815–820 (2017).
- 564 20. A. Guskov, *et al.*, Cyanobacterial photosystem II at 2.9-Å resolution  
565 and the role of quinones, lipids, channels and chloride. *Nat. Struct.  
566 Mol. Biol.* **16**, 334–342 (2009).
- 567 21. X. Wei, *et al.*, Structure of spinach photosystem II-LHCII  
568 supercomplex at 3.2 Å resolution. *Nature* **534**, 69–74 (2016).
- 569 22. B. Loll, J. Kern, W. Saenger, A. Zouni, J. Biesiadka, Lipids in  
570 photosystem II: Interactions with protein and cofactors. *Biochim.  
571 Biophys. Acta - Bioenerg.* **1767**, 509–519 (2007).
- 572 23. H. W. Wang, J. W. Wang, How cryo-electron microscopy and X-ray  
573 crystallography complement each other. *Protein Sci.* **26**, 32–39  
574 (2017).
- 575 24. J. M. Rondeau, H. Schreuder, *Protein Crystallography and Drug  
576 Discovery* (Elsevier Ltd, 2015) <https://doi.org/10.1016/B978-0-12-417205-0.00022-5>.
- 578 25. Y. Umena, K. Kawakami, J. R. Shen, N. Kamiya, Crystal structure  
579 of oxygen-evolving photosystem II at a resolution of 1.9 Å. *Nature*  
580 **473**, 55–60 (2011).
- 581 26. A. Zouni, *et al.*, Crystal structure of photosystem II from  
582 *Synechococcus elongatus* at 3.8 Å resolution. *Nature* **409**, 739–743  
583 (2001).
- 584 27. Y. Nakajima, *et al.*, Thylakoid membrane lipid sulfoquinovosyl-  
585 diacylglycerol (SQDG) is required for full functioning of  
586 photosystem II in *Thermosynechococcus elongatus*. *J. Biol. Chem.*  
587 **293**, 14786–14797 (2018).
- 588 28. J. Hellmich, *et al.*, Native-like Photosystem II Superstructure at 2.44  
589 Å Resolution through Detergent Extraction from the Protein  
590 Crystal. *Structure* **22**, 1607–1615 (2014).
- 591 29. F. Müh, A. Zouni, Structural basis of light-harvesting in the  
592 photosystem II core complex. *Protein Sci.* **29**, 1090–1119 (2020).
- 593 30. A. Crepin, S. Santabarbara, S. Caffarri, Biochemical and  
594 spectroscopic characterization of highly stable photosystem II  
595 supercomplexes from Arabidopsis. *J. Biol. Chem.* **291**, 19157–19171  
596 (2016).
- 597 31. C. Pagliano, S. Barera, F. Chimirri, G. Saracco, J. Barber,  
598 Comparison of the  $\alpha$  and  $\beta$  isomeric forms of the detergent n-  
599 dodecyl-D-maltoside for solubilizing photosynthetic complexes  
600 from pea thylakoid membranes. *Biochim. Biophys. Acta - Bioenerg.*  
601 **1817**, 1506–1515 (2012).
- 602 32. L. S. Van Bezouwen, *et al.*, Subunit and chlorophyll organization of  
603 the plant photosystem II supercomplex. *Nat. Plants* **3**, 1–11 (2017).
- 604 33. N. Adir, Crystallization of the oxygen-evolving reaction centre of  
605 photosystem II in nine different detergent mixtures. *Acta  
606 Crystallogr. Sect. D Biol. Crystallogr.* **55**, 891–894 (1999).
- 607 34. P. C. A. da Fonseca, E. P. Morris, C. Büchel, ‘Electron  
608 Crystallography in Photosynthesis Research’ in (2008), pp. 125–  
609 150.
- 610 35. Y. Cheng, N. Grigorieff, P. A. Penczek, T. Walz, A primer to single-  
611 particle cryo-electron microscopy. *Cell* **161**, 438–449 (2015).
- 612 36. B. Andersson, E.-M. Aro, ‘Photodamage and D1 Protein Turnover  
613 in Photosystem II’ in *Regulation of Photosynthesis*, (Kluwer  
614 Academic Publishers), pp. 377–393.
- 615 37. J. Nickelsen, B. Rengstl, Photosystem II assembly: From  
616 cyanobacteria to plants. *Annu. Rev. Plant Biol.* **64**, 609–635 (2013).
- 617 38. A. P. Avramov, H. J. Hwang, R. L. Burnap, The role of Ca<sup>2+</sup> and  
618 protein scaffolding in the formation of nature’s water oxidizing  
619 complex. *Proc. Natl. Acad. Sci. U. S. A.* **117**, 28036–28045 (2020).
- 620 39. C. J. Gisriel, *et al.*, Cryo-EM Structure of Monomeric Photosystem  
621 II from *Synechocystis* sp. PCC 6803 Lacking the Water-Oxidation  
622 Complex. *Joule* (2020) <https://doi.org/10.1016/j.joule.2020.07.016>.
- 623 40. D. A. Berthold, G. T. Babcock, C. F. Yocum, A Highly Resolved,  
624 Oxygen Evolving Photosystem II Preparation from Spinach  
625 Thylakoid Membranes. *Fed. Eur. Biochem. Soc. Lett.* **134**, 231–234  
626 (1981).
- 627 41. B. Lundin, M. Hansson, B. Schoefs, A. V. Vener, C. Spetea, The  
628 Arabidopsis PsbO2 protein regulates dephosphorylation and  
629 turnover of the photosystem II reaction centre D1 protein. *Plant J.*  
630 **49**, 528–539 (2007).
- 631 42. C. Funk, *et al.*, The PSII-S Protein of Higher Plants: A New Type of  
632 Pigment-Binding Protein. *Biochemistry* **34**, 11133–11141 (1995).
- 633 43. S. Jansson, A guide to the Lhc genes and their relatives in  
634 Arabidopsis. *Trends Plant Sci.* **4**, 236–240 (1999).
- 635 44. J. G. García-Cerdán, *et al.*, The PsbW protein stabilizes the  
636 supramolecular organization of photosystem II in higher plants.  
637 *Plant J.* **65**, 368–381 (2011).
- 638 45. L. X. Shi, Z. J. Lorković, R. Oelmüller, W. P. Schröder, The low  
639 molecular mass PsbW protein is involved in the stabilization of the  
640 dimeric photosystem II complex in Arabidopsis thaliana. *J. Biol.  
641 Chem.* **275**, 37945–37950 (2000).
- 642 46. L. X. Shi, Z. J. Lorković, R. Oelmüller, W. P. Schröder, The low  
643 molecular mass PsbW protein is involved in the stabilization of the  
644 dimeric photosystem II complex in Arabidopsis thaliana. *J. Biol.  
645 Chem.* **275**, 37945–37950 (2000).
- 646 47. R. E. Regel, *et al.*, Deregulation of Electron Flow within  
647 Photosystem II in the Absence of the PsbJ Protein. *J. Biol. Chem.* **276**,  
648 41473–41478 (2001).
- 649 48. L. Von Sydow, *et al.*, The PsbY protein of Arabidopsis Photosystem  
650 II is important for the redox control of cytochrome b559. *Biochim.  
651 Biophys. Acta - Bioenerg.* **1857**, 1524–1533 (2016).
- 652 49. B. Korchowiec, *et al.*, Impact of two different saponins on the  
653 organization of model lipid membranes. *Biochim. Biophys. Acta -  
654 Biomembr.* **1848**, 1963–1973 (2015).
- 655 50. S. Hobe, R. Foerster, J. Klingler, H. Paulsen, N-Proximal Sequence  
656 Motif in Light-Harvesting Chlorophyll a/b-Binding Protein Is  
657 Essential for the Trimerization of Light-Harvesting Chlorophyll a/b  
658 Complex. *Biochemistry* **34**, 10224–10228 (1995).

- 659 51. O. Kruse, *et al.*, Phosphatidylglycerol Is Involved in the  
660 Dimerization of Photosystem II. *J. Biol. Chem.* **275**, 6509–6514 (2000).
- 661 52. Q. Zhu, *et al.*, Function of PsbO-Asp158 in photosystem II: effects  
662 of mutation of this residue on the binding of PsbO and function of  
663 PSII in *Thermosynechococcus vulcanus*. *Photosynth. Res.* **146**, 29–40  
664 (2020).
- 665 53. M. Suorsa, *et al.*, PsbR, a missing link in the assembly of the oxygen-  
666 evolving complex of plant photosystem II. *J. Biol. Chem.* **281**, 145–  
667 150 (2006).
- 668 54. Y. E. Chen, *et al.*, The low molecular mass photosystem II protein  
669 PsbTn is important for light acclimation. *Plant Physiol.* **179**, 1739–  
670 1753 (2019).
- 671 55. R. Danev, B. Buijsse, M. Khoshouei, J. M. Plitzko, W. Baumeister,  
672 Volta potential phase plate for in-focus phase contrast transmission  
673 electron microscopy. *Proc. Natl. Acad. Sci. U. S. A.* **111**, 15635–15640  
674 (2014).
- 675 56. A. Punjani, J. L. Rubinstein, D. J. Fleet, M. A. Brubaker,  
676 CryoSPARC: Algorithms for rapid unsupervised cryo-EM  
677 structure determination. *Nat. Methods* **14**, 290–296 (2017).
- 678 57. T. C. Terwilliger, O. V. Sobolev, P. V. Afonine, P. D. Adams,  
679 Automated map sharpening by maximization of detail and  
680 connectivity. *Acta Crystallogr. Sect. D Struct. Biol.* **74**, 545–559 (2018).
- 681 58. T. C. Terwilliger, S. J. Ludtke, R. J. Read, P. D. Adams, P. V.  
682 Afonine, Improvement of cryo-EM maps by density modification.  
683 *Nat. Methods* **17**, 923–927 (2020).
- 684 59. E. F. Pettersen, *et al.*, UCSF Chimera - A visualization system for  
685 exploratory research and analysis. *J. Comput. Chem.* **25**, 1605–1612  
686 (2004).
- 687 60. P. Emsley, B. Lohkamp, W. G. Scott, K. Cowtan, Features and  
688 development of Coot. *Acta Crystallogr. Sect. D Biol. Crystallogr.* **66**,  
689 486–501 (2010).
- 690 61. P. V. Afonine, *et al.*, Real-space refinement in PHENIX for cryo-EM  
691 and crystallography. *Acta Crystallogr. Sect. D Struct. Biol.* **74**, 531–  
692 544 (2018).
- 693 62. E. F. Pettersen, *et al.*, UCSF ChimeraX: Structure visualization for  
694 researchers, educators, and developers. *Protein Sci.* **8**, 70–82 (2020).
- 695 63. S. Unni, *et al.*, Web servers and services for electrostatics  
696 calculations with APBS and PDB2PQR. *J. Comput. Chem.* **32**, 1488–  
697 1491 (2011).
- 698
